# Supplementary material for: Genome Wide Identification of Respiratory Burst Oxidase Homolog (Rboh) Genes in Citrus sinensis and Functional Analysis of CsRbohD in Cold Tolerance
Source: MDPI journal article supplement (doi:10.3390/ijms23020648), 2022-01-07
Supplement: s1 [file s1]

|                                 |                                                                                                                                       |     |
|---------------------------------|---------------------------------------------------------------------------------------------------------------------------------------|-----|
| AtRbohA                         | LNHNEEMQK.....LGFENVRVYTT-ESFVNR.....QSSASNV.....ATTSYVNGVE-DEPVVEITLSINDSS-VSVYVQKSPNHRGAGS-N.....YEDDSLRGQ.....RSGRNSVLKRLA         | 96  |
| CaRbohA                         | MDIQDYKDD.....SLSEGTSTSSRVGVSGLPSGLPVT.....TNKKK.....SSRKARFQDQ-DECVVEITLVDDDS-VSVONI R6D.....SETAFLAGR.....LER.....KPS               | 93  |
| CaRbohB                         | MRSLRSRSSRS.....NYQRTFF.....ELPDQC-EDPOSRTSDYVGGAAMPVFLN.....DLSRNSQDQG-ADQLVELTIELEHA-VVLVSYSTPTAPA.....RVG                          | 87  |
| CaRbohC                         | MRGSASHRRW.....ASDTPGRAVVS.....S-ASSPGETSNG-AEEVVEITBLODDTIVLRSEVAP-PHVFSIEDGAGAGSETPSSA.....SPSP                                     | 87  |
| CaRbohD                         | MHAESQETLS.....C-SSSSSSSSSSPSCSACVPLAFSPVOGT-VTV.....                                                                                 | 43  |
| CaRbohE                         | MGTEHHQW.....HHNSDTEVLNERIPVSGPLSGLNKR.....VGRKSTFML.....ATSSSSSSPH-DEPVVEITLVDDDS-VAVHSVKAAGSDNSMLQE.....DPEITLLAKG.....LEKSTSTGSEA  | 113 |
| CaRbohF                         | NKMRSEEGRGVYIENNSDTEISQDSKSAFSOPLA.....NKR.....ASKKSARFNLPEAAVTSNNND-DGQVVEITLDRDS-VAVHSVQALH-H.....E.....DPELSLLAKKTLEINKNSSSRSLF    | 116 |
| CaRbohG                         | MYGSNSRKHA.....DS.....RSVLESLE-VDRM-VDVPINDRT-SGRVSVKPTT.....APSLR                                                                    | 40  |
| Respiratory burst NADPH oxidase |                                                                                                                                       |     |
| AtRbohA                         | SSVSTQITRVASSVSSSSR.....KPPR-POLAKLR-SK-SRRELALKGLKFTKTDGV.....TQWPEKRFVYVMTMT-TNG.....LHRS                                           | 173 |
| CaRbohA                         | SALSARLRQVSEKLRM-AS.....S.....KRFDKVBR-TK-SQARALKGLKFTKNVGT.....ENQVEKRFDELA.....VDR.....MLPKS                                        | 164 |
| CaRbohB                         | ESGSGSRIFG-WLRD.....SSSDIE.....ERTISARDE-RIKERLOS-AR-SQKRALNGLRFSKTABASDAEQLNKLVSREELA.....EDG.....LLARE                              | 174 |
| CaRbohC                         | RSSEKKLRHFQELKAE-VAKAKQFSQELKAE LRFSWSHGQASRVLSASTSSSAQNGNFDALAAARAL-KORALDR-TR-SQAKALRLRFSNSSKT-NGVDANNEVOSNKLKLA-KG.....FLYRA       | 212 |
| CaRbohD                         | .....PFSAGWNRHYRDASGENLITGLEIIPLRFTN.....LEWTDVEARFORLAYT-KNTEPEVIKWS                                                                 | 101 |
| CaRbohE                         | RTABAKIRQVSEKLR-AS.....FAKKPOPPARFDR-NK-SAAAYALKGLKFTSKTDG.....ADHANKEKREDEITAS-TNG.....VYRA                                          | 190 |
| CaRbohF                         | RNTSHIVQVSELEKRF-AS.....LTRR-PSRRFDR-TK-SAAAHALKGLKFTTKTSAAG-ONGNPAKFNKYNELAITSDG.....LHCS                                            | 195 |
| CaRbohG                         | RNASITAIRSQA-ML.....QT.....N-SI-RNPAKMR-TA-SGARQGLRLRLDTVTG-KENDAWRSIERZQFA.....VNG.....RLPKD                                         | 121 |
| EF-hand domain                  |                                                                                                                                       |     |
| AtRbohA                         | RFGECIQMK-STEFALALDALARRENVSG-DSINIELKFWKQITDGOFSRLRTFRAMVDKSDGRLEAEVREIITLSASANEKNIRRAQDEYAAIMIELDPRHYHYMIENLEILLQAPMQDVR-DG         | 305 |
| CaRbohA                         | SFGQCIQMN-ESKQFASLFDALARRRGLTS-SSITKSELRFQWEDITDOSTFARLETFIDMVQKNLDORITEEVKEIIALSASANKLKIQRVEEYAAIMIELDPHNLQVIELYNLEMLLQAPSGANLLT     | 298 |
| CaRbohB                         | DFGECIQMV-DTEKFAVIFDALARRQDKI-OKIMELREEMEDIDOSTFARLQIFDQABSGVDGRIIEVEDELLMSASANKLKEGAEYAAIMIELDPENLVIELWELTLLQDQTYMNY-SR              | 307 |
| CaRbohC                         | DQACIQMR-DSKEFALFELDALRRRLKLV-QK-SREELVEYMSQITDOSTFASRLQIFDQVKNNDORIAIEEVEKIIIMLSASANKLRLHQAEYAAIMIELDPRGLQVLEWDELTLQDQTYLNY-SQ       | 345 |
| CaRbohD                         | DFFSICIAMQ-OTPEFANEILRALRGSEWKV-DITKHELFDYNNHMA-QEVSRIQLFTYMCORFQKIDQIDMKQITLOSASANKLMTHEAEYAAIMIELDKKRVLELDTFKVSPRASYGRS-SP          | 322 |
| CaRbohE                         | DFSGIQMNSDKDFAVELFDALTRRNIGQ-DITKQDLREFWQIDSDOSTFASRLQTFIDMVQKQADGRITTEVEVEIITLSASANKLNIQKAEYAAIMIELDPHLYIIMIDNLEMLLQAPAGSVK-GG       | 324 |
| CaRbohF                         | DFFSGIQMKESKEAQLPOLGRKHNIIGQ-DSINKAQLREFWQIDSESTFASRLQTFIDMVQKQADGRITTEVEVEIITLSASANKLNIQKAEYAAIMIELDPHAGVIMIHNLLEMLLQAPAGSVR-VQ      | 329 |
| CaRbohG                         | MEGIVQMG-ESTESVQVELEKRRKRVNTENG-LEVEVRFEDMTKKQILBALQ-LEEDICDKDQSG-LTEDVEVEIITLSASANKLNLKENSSTYAAIMIELDQCKQVTEWDELLELMQVNEEPP-...      | 253 |
| Transmembrane domain            |                                                                                                                                       |     |
| AtRbohA                         | EG---KKLSKMLSQNLMPVQSRNLGARFCRGMKYFLDNKKRVVWMLVIGAMAGLTWKFMEKKRSAYEVHMGVQCIKAGAAETLKLMMAILLPVCRNTITWLRTKTLKSAIVPFDRLNFHVIAGIGSVGV     | 439 |
| CaRbohA                         | DS---RVLSQMSLSQRLVFTKDRNPRIKCCRGLSYFVODNKKRIWVMLLWLSICAGLTWKFQVKKHRAVFMVGVCTTAKGAAETLKLMMAILLPVCRNTITWLRSRTKLQRVVPFDNINFHVIAGVAGIGV   | 432 |
| CaRbohB                         | PLSTSTKSNWSQNLSEFTPKGALRKLSTFTKCLVLEWQDRIWILLWMMAMAGLFAWKTIOYKNMAAFQVGVGLTTAKGAAETLKLMMAILLPVCRNTITWLRS-TRARYVPFDNINFHVIAGVAGIGV      | 442 |
| CaRbohC                         | AL---SVTSGALSQNLQDLKKRRIKRMSTFVVEQEWPRRLVLSWILIMDQTTWKFQVKKHRAVFMVGLTTAKGAAETLKLMMAILLPVCRNTITWLRS-TRARYVPFDNINFHVIAGVAGIGV           | 478 |
| CaRbohD                         | TF-DLLYHEPMKN.....EVFRSRYWRANVLFVLLCLQVLTWKFQVSHRPAQFQVGVGLSTAKGAAETLKLMMAILLPVCRNTVWLKRWKSSIIIFENDNFHKLACGVGVGV                      | 350 |
| CaRbohE                         | ES---RNLSHMLSKKKFTQFNPIRCCDSTMYFLLDNRQVWVMAQVIGMAGLTWKTIOYKNRAAFQVHGLVGMKAGAAETLKLMMAILLPVCRNTITWLNRKTLQGVVPFDNINFHVIAGVAGIGV         | 468 |
| CaRbohF                         | DS---RLSLSQMSLSQNLQDLKKRRIKRMSTFVVEQEWPRRLVLSWILIMDQTTWKFQVKKHRAVFMVGLTTAKGAAETLKLMMAILLPVCRNTITWLNRKTLQGVVPFDNINFHVIAGVAGIGV         | 468 |
| CaRbohG                         | KM---NNRTSTLTKAMIRONYNPTTKFFSMITTEIFIDFKFNIIVTLQVNLVGLTWKTELOSQVGVCTTAKGAAETLKLMMAILLPVCRNTITWLNRKTLQGVVPFDNINFHVIAGVAGIGV            | 386 |
| Ferric reduct                   |                                                                                                                                       |     |
| AtRbohA                         | IAATSHLACDPPRLAHADQDEVE-PMKRYFGQPTK-RPLDFQSVGVGVGVGVVULMTAETLATWFRNN-LNPLRLKKITQFNATWYSHHLFVIVVGLFIVHGVFVVLIEPWHKRTWMYLAVPVLVYACER    | 573 |
| CaRbohA                         | LHAHAHLCDDPRLAHADQDEVE-PMKRYFGQPTK-RPLDFQSVGVGVGVGVVULMTAETLATWFRNN-LNPLRLKKITQFNATWYSHHLFVIVVGLFIVHGVFVVLIEPWHKRTWMYLAVPVLVYACER     | 566 |
| CaRbohB                         | LHGVNHLACDPPRLVNSPPEFA-PMSTQFNHKKP-TYKYLTTQVEQVTOIVMVULMAIAFTLATHKFRNGVRLPSFFNRLTQFNATWYSHHLTAIVVILLIVHGNFLVLA-HEWYKRTWMYLAVPVLVYACER | 575 |
| CaRbohC                         | LHGVNHLACDPPRLVNSPPEFA-PMSTQFNHKKP-TYKYLTTQVEQVTOIVMVULMAIAFTLATHKFRNGVRLPSFFNRLTQFNATWYSHHLTAIVVILLIVHGNFLVLA-HEWYKRTWMYLAVPVLVYACER | 612 |
| CaRbohD                         | LHGVNHLACDPPRLVNSPPEFA-PMSTQFNHKKP-TYKYLTTQVEQVTOIVMVULMAIAFTLATHKFRNGVRLPSFFNRLTQFNATWYSHHLTAIVVILLIVHGNFLVLA-HEWYKRTWMYLAVPVLVYACER | 484 |
| CaRbohE                         | IAHAHLACDPPRLVNSPPEFA-PMSTQFNHKKP-TYKYLTTQVEQVTOIVMVULMAIAFTLATHKFRNGVRLPSFFNRLTQFNATWYSHHLTAIVVILLIVHGNFLVLA-HEWYKRTWMYLAVPVLVYACER  | 561 |
| CaRbohF                         | LHAHAHLCDDPRLAHADQDEVE-PMKRYFGQPTK-RPLDFQSVGVGVGVGVVULMTAETLATWFRNN-LNPLRLKKITQFNATWYSHHLFVIVVGLFIVHGVFVVLIEPWHKRTWMYLAVPVLVYACER     | 567 |
| CaRbohG                         | VITLTHLLNLY-SSCRPFRKMYLGLPALNVHQR-TYVDLMHTVRYGVGLVLMIAISFSLATSHSENNIKLWIFHRFAENQFWAKHLLVLAVLFMHGQVITFD-KPWMDKTTNIFFRVLFANER           | 520 |
| FAD-binding domain 8            |                                                                                                                                       |     |
| AtRbohA                         | LIARFQEVGAQVLRVAVLPQWGLHLEPQFNRTSSQWVNLGAVTLNHPFSITSAPODDVLSVHIRTLDQWTLQELSLSEVGRPPPP---DEHRFNRRDSKH-----WDVIPQRFILIDGPYGA            | 609 |
| CaRbohA                         | LIARFQEVGSYRIKLVAVYFQWNLALQSKRQPFNTSGOQVFNNAAGVQKHPFSITSAPODDVLSHIRTLDQWTLQELSLSEVGRPPPP---ADNRPRPKLLIDGPYGA                          | 602 |
| CaRbohB                         | LNHTRRSQHSKADKXVSLPQWGLVMSKRNQFRVRSQOYFLOQPTIESFEWHPFSITSAPODDVLSVHIRTLDQWTLQELSLSEVGRPPPP---GATNRRIKRLIDGPYGA                        | 608 |
| CaRbohC                         | TLHFRRSQHSKADKXVSLPQWGLVMSKRNQFRVRSQOYFLOQPTIESFEWHPFSITSAPODDVLSVHIRTLDQWTLQELSLSEVGRPPPP---GATNRRIKRLIDGPYGA                        | 735 |
| CaRbohD                         | LYRVRSQIYELINKETPSLVPGLVLSMKKQEFNRYRABVMVFQCPREISFEWHPFSITSAPODDVLSVHIRTLDQWTLQELSLSEVGRPPPP---GATNRRIKRLIDGPYGA                      | 593 |
| CaRbohE                         | LIARFQEVGAQVLRVAVLPQWGLHLEPQFNRTSSQWVNLGAVTLNHPFSITSAPODDVLSVHIRTLDQWTLQELSLSEVGRPPPP---DEHRFNRRDSKH-----WDVIPQRFILIDGPYGA            | 714 |
| CaRbohF                         | LTBALRSIEIPKILKLVAVYFQWNLALHMSKQPFNTSGOQVFNNAAGVQKHPFSITSAPODDVLSVHIRTLDQWTLQELSLSEVGRPPPP---GATNRRIKRLIDGPYGA                        | 721 |
| CaRbohG                         | FLAKFHLNHLKVEIVNAVITQNLVALYMTKRPQTKVQSGMLVKKRQPLPFEWHPFSITSAPODDVLSVHIRTLDQWTLQELSLSEVGRPPPP---GATNRRIKRLIDGPYGA                      | 656 |
| NAD-binding domain 6            |                                                                                                                                       |     |
| AtRbohA                         | PAQDYKFEVLLVLQGLQIATGTFISIVSDIINNLKQVEGSS-N-RROSPH-----NMVTPPVSPSRKSETFRTRKAYFVWVTRQGGSDFWKGMVDEVTETRR-KNVIELHNYQTSVYEEGARSALITN      | 822 |
| CaRbohA                         | PAQDYKFEVLLVLQGLQIATGTFISIVSDIINNLKQVEGSS-N-RROSPH-----NMVTPPVSPSRKSETFRTRKAYFVWVTRQGGSDFWKGMVDEVTETRR-KNVIELHNYQTSVYEEGARSALITN      | 830 |
| CaRbohB                         | PAQDYKFEVLLVLQGLQIATGTFISIVSDIINNLKQVEGSS-N-RROSPH-----NMVTPPVSPSRKSETFRTRKAYFVWVTRQGGSDFWKGMVDEVTETRR-KNVIELHNYQTSVYEEGARSALITN      | 830 |
| CaRbohC                         | PAQDYKFEVLLVLQGLQIATGTFISIVSDIINNLKQVEGSS-N-RROSPH-----NMVTPPVSPSRKSETFRTRKAYFVWVTRQGGSDFWKGMVDEVTETRR-KNVIELHNYQTSVYEEGARSALITN      | 896 |
| CaRbohD                         | SSQDYVYKDVLLVLQGLQIATGTFISIVSDIINNLKQVEGSS-N-RROSPH-----NMVTPPVSPSRKSETFRTRKAYFVWVTRQGGSDFWKGMVDEVTETRR-KNVIELHNYQTSVYEEGARSALITN     | 896 |
| CaRbohE                         | PAQDYKFEVLLVLQGLQIATGTFISIVSDIINNLKQVEGSS-N-RROSPH-----NMVTPPVSPSRKSETFRTRKAYFVWVTRQGGSDFWKGMVDEVTETRR-KNVIELHNYQTSVYEEGARSALITN      | 849 |
| CaRbohF                         | PAQDYKFEVLLVLQGLQIATGTFISIVSDIINNLKQVEGSS-N-RROSPH-----NMVTPPVSPSRKSETFRTRKAYFVWVTRQGGSDFWKGMVDEVTETRR-KNVIELHNYQTSVYEEGARSALITN      | 835 |
| CaRbohG                         | PAQDYKFEVLLVLQGLQIATGTFISIVSDIINNLKQVEGSS-N-RROSPH-----NMVTPPVSPSRKSETFRTRKAYFVWVTRQGGSDFWKGMVDEVTETRR-KNVIELHNYQTSVYEEGARSALITN      | 782 |
| NAD-binding domain 6            |                                                                                                                                       |     |
| AtRbohA                         | LSLSNKAHNDVDSVQTRVMSHFAPNWRSGFKRIAVNN.....PKTRVGVFYCGAAGLVKELRHSLDFSHKSTKTFPHKEN                                                      | 902 |
| CaRbohA                         | LSLSNKAHNDVDSVQTRVMSHFAPNWRSGFKRIAVNN.....PKTRVGVFYCGAAGLVKELRHSLDFSHKSTKTFPHKEN                                                      | 889 |
| CaRbohB                         | LSLSNKAHNDVDSVQTRVMSHFAPNWRSGFKRIAVNN.....PKTRVGVFYCGAAGLVKELRHSLDFSHKSTKTFPHKEN                                                      | 910 |
| CaRbohC                         | LSLSNKAHNDVDSVQTRVMSHFAPNWRSGFKRIAVNN.....PKTRVGVFYCGAAGLVKELRHSLDFSHKSTKTFPHKEN                                                      | 940 |
| CaRbohD                         | LSLSNKAHNDVDSVQTRVMSHFAPNWRSGFKRIAVNN.....PKTRVGVFYCGAAGLVKELRHSLDFSHKSTKTFPHKEN                                                      | 777 |
| CaRbohE                         | LSLSNKAHNDVDSVQTRVMSHFAPNWRSGFKRIAVNN.....PKTRVGVFYCGAAGLVKELRHSLDFSHKSTKTFPHKEN                                                      | 929 |
| CaRbohF                         | LSLSNKAHNDVDSVQTRVMSHFAPNWRSGFKRIAVNN.....PKTRVGVFYCGAAGLVKELRHSLDFSHKSTKTFPHKEN                                                      | 915 |
| CaRbohG                         | LSLSNKAHNDVDSVQTRVMSHFAPNWRSGFKRIAVNN.....PKTRVGVFYCGAAGLVKELRHSLDFSHKSTKTFPHKEN                                                      | 842 |

Supplementary Figure S1. Alignment of the CsRboh protein sequences. The *Arabidopsis* AtRbohA is also included in this analysis. Conserved domains in alignment are highlighted with colored lines, and their names are given above the conserved regions.

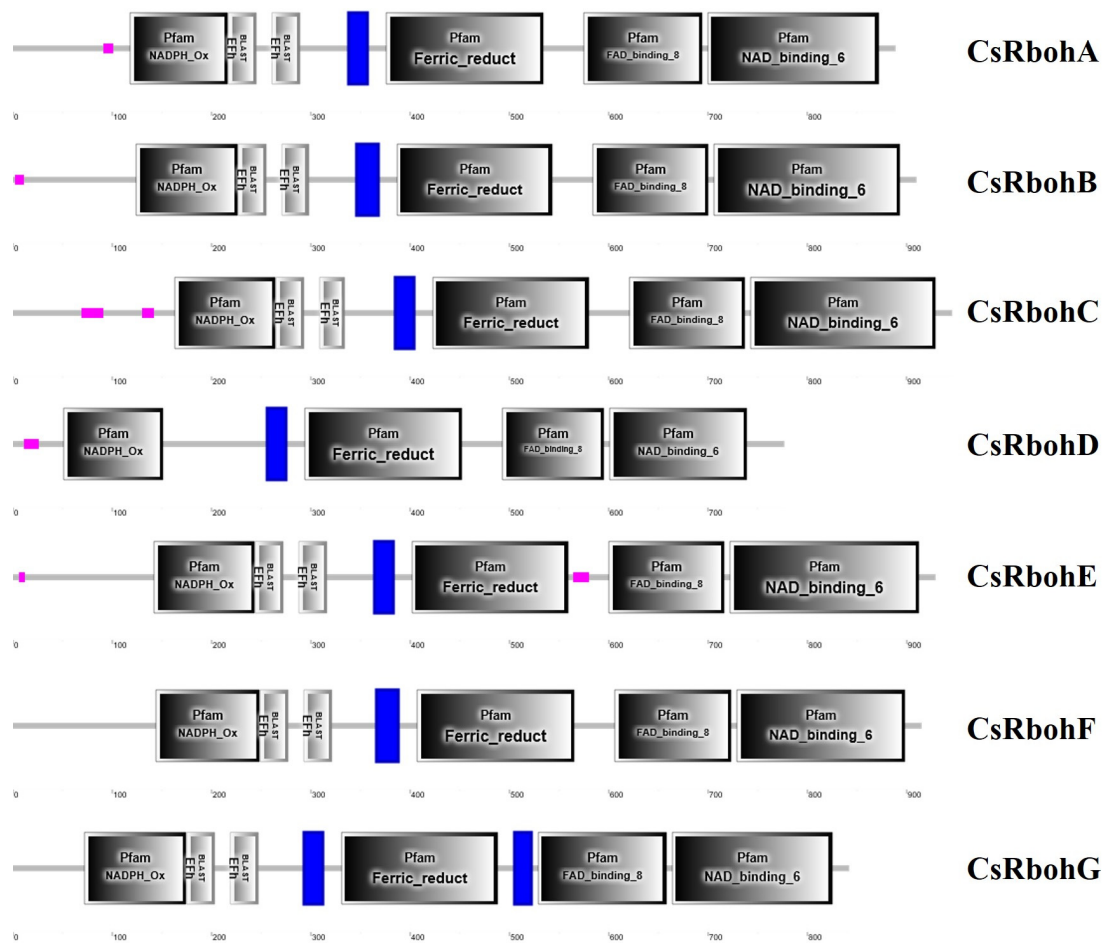

Supplementary Figure S2. Domain compositions of CsRboh proteins by SMART analysis. Only major domains (NADPH\_Ox, Ferric\_reduct, FAD\_binding\_8, and NAD\_binding\_6) were presented here. Blue box in figure indicates the trans-membrane domain while pink indicates low complexity region.

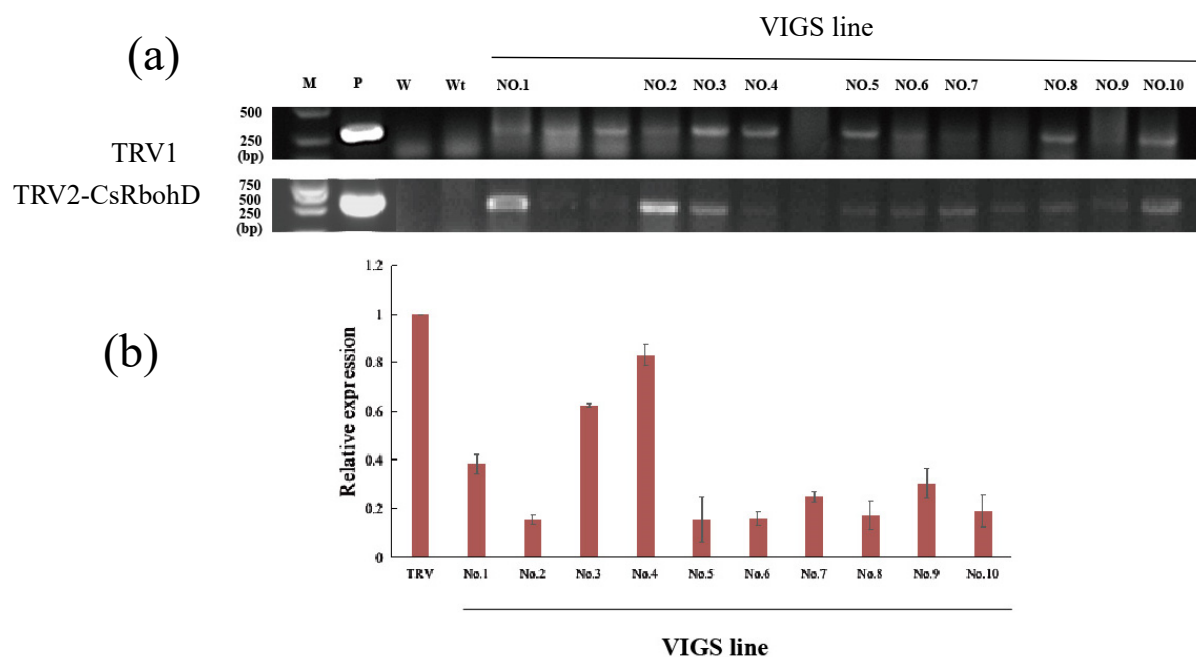

Supplementary Figure S3. Molecular characterization of the VIGS plants by genomic PCR and qRT-PCR. (a) Characterization of positive VIGS plants by genomic PCR amplification. (b) Analysis of *CsRbohD* expression in the control (TRV) and VIGS plants using qRT-PCR.
