# Supplementary material for: Genome Wide Identification of Respiratory Burst Oxidase Homolog (Rboh) Genes in Citrus sinensis and Functional Analysis of CsRbohD in Cold Tolerance
Source: Int J Mol Sci. 2022 Jan 7;23(2):648. doi: 10.3390/ijms23020648 (PMC8776138; doi:10.3390/ijms23020648)
Supplement: Supplementary file 1 [file ijms-23-00648-s001.zip › Supplementary Table S1 Primers used in this study.xlsx]

## Sheet: Sheet1
Table S1 Primers used in this study
Gene Name	Gene_ID	Forward primer (5'to 3')	Reverse primers(5'to 3')
CsRbohA	Cs3g14240	ACCATGCTTCAGTCCATCCA	GCTCCACAGTAAAACACCCC
CsRbohB	Cs4g06920	ATCGAGCTGCACAACTACCT	ACCTATCGTGGCATTCGGAT
CsRbohC	Cs5g02940	GAATCGCGGAGGAGGAAGTA	GCAAAAGCGTCTCCAATTGC
CsRbohD	Cs5g11890	GAAACGTTGGCTGAGCTCAA	ATGACCATGGCTATTCCCGT
CsRbohE	Cs7g19320	CGGACACAGAGGTTCTTGGC	GGTGCTCTTCCTGCCAACTC
CsRbohF	Cs8g12000	CATCACCACCAAGACGGGAG	TCGAGCAATGAAGAAGGCCG
CsRbohG	Cs8g17640	CCTCCAGGCTTCAAGTACCA	TCCCCTGTTTGGTTTTGCTG
TRV1		ATTGAGGCGAAGTACGATGG	CCATCCACAATTATTTTCCGC
TRV2		ATTCACTGGGAGATGATACGCT
CsRbohD-pTRV2		AGAAGGCCTCCATGGGGATCCGAGATGTTGCTAATAATGCCCAG	TGTCTTCGGGACATGCCCGGGTTGGTTCTGTAGGAGAAGGTGGT
β-actin		GACTCTGGTGATGGTGT	CACTTCATGATGGAGTTGT
